# Supplementary material for: COVID-19 and regional differences in the timeliness of hip-fracture surgery: an interrupted time-series analysis
Source: PeerJ. 2021 Aug 31;9:e12046. doi: 10.7717/peerj.12046 (PMC8415287; doi:10.7717/peerj.12046)
Supplement: Supplemental Information 3 [file peerj-09-12046-s003.xlsx]

## Sheet: data
region	period	week	hosp_std_rate	surg0_std_rate	surg1_std_rate	surg2_std_rate
1	1	1	12.7202	19.7303	55.5344	82.2101
1	1	2	14.5173	17.8722	48.8839	73.9975
1	1	3	11.4897	9.1304	40.5724	66.528
1	1	4	10.2394	10.2626	32.8873	65.665
1	1	5	12.1615	14.8928	46.8302	65.4117
1	1	6	11.745	13.1269	43.8967	66.0079
1	1	7	13.8973	12.2809	41.5689	63.5492
1	1	8	11.8088	14.0874	52.8259	71.4027
1	1	9	13.0669	12.2027	50.2122	72.6836
1	1	10	12.6159	10.3063	38.9967	65.596
1	1	11	11.8633	10.8518	42.9369	71.1946
1	1	12	11.3461	10.8956	44.1808	65.1837
1	1	13	12.048	10.6225	40.8143	68.4416
1	1	14	9.63079	13.4371	40.8109	69.1312
1	1	15	12.153	13.2396	46.4735	66.8533
1	1	16	13.1081	15.3726	39.3922	61.3161
1	1	17	10.8386	11.6562	41.1154	69.5565
1	1	18	11.0743	12.9353	40.4152	70.4894
1	1	19	10.8287	19.4913	42.3653	64.984
1	1	20	10.8455	8.40756	39.7517	67.1111
1	1	21	12.9353	10.8475	43.612	67.5426
1	1	22	11.9208	14.2326	40.4632	65.4348
1	1	23	9.66428	14.7762	50.5611	72.4237
1	1	24	13.6244	13.0386	44.0751	72.2347
1	1	25	11.148	12.7961	44.9547	66.6853
1	1	26	12.993	15.5197	45.6876	70.3434
1	2	1	10.2315	13.2281	44.0365	68.9041
1	2	2	13.1702	11.1501	39.7218	58.1467
1	2	3	13.1691	7.82031	32.2698	66.6533
1	2	4	12.0058	10.1071	43.9724	68.0115
1	2	5	12.6034	15.2158	46.7995	67.6748
1	2	6	10.5043	10.8588	45.0451	70.7935
1	2	7	11.0457	15.775	41.5192	67.2774
1	2	8	10.4953	15.8944	44.1072	68.0128
1	2	9	11.4329	13.4031	56.486	78.8508
1	2	10	10.1068	12.7032	40.1289	67.5893
1	2	11	12.0448	12.0693	51.4039	75.5001
1	2	12	11.3763	10.6088	41.6164	62.8224
1	2	13	10.6164	8.63927	46.5634	63.1682
1	2	14	7.85247	16.7101	66.1231	76.9773
1	2	15	8.77033	11.263	42.5021	66.4616
1	2	16	7.08611	13.9872	46.9042	66.1392
1	2	17	7.5208	5.34196	34.123	57.4678
1	2	18	9.13561	11.3838	37.2154	57.5096
1	2	19	8.40905	9.53756	38.4157	61.5626
1	2	20	8.21907	8.44255	42.5712	67.5423
1	2	21	9.19521	7.96156	43.8398	66.7456
1	2	22	11.2661	15.3409	49.7554	70.8579
1	2	23	11.294	11.0534	40.117	67.5998
1	2	24	11.0791	14.2083	49.6865	70.2635
1	2	25	11.7355	15.3717	45.8866	63.0963
1	2	26	10.0664	12.1918	51.6711	73.4612
2	1	1	12.2678	12.0816	44.3537	73.7149
2	1	2	12.8347	7.35686	41.4408	71.3747
2	1	3	12.9154	5.71132	34.3477	65.3298
2	1	4	12.9534	15.118	53.2699	87.869
2	1	5	14.2639	6.67417	32.1247	68.7822
2	1	6	11.2122	7.53706	44.5704	78.3624
2	1	7	11.6577	9.74676	40.0149	78.9211
2	1	8	11.5847	8.97246	45.3096	78.0406
2	1	9	10.9103	12.8271	44.8837	72.9945
2	1	10	10.888	5.41766	39.4012	81.5039
2	1	11	11.1543	7.04581	45.5438	73.9094
2	1	12	12.1819	3.80452	36.4147	80.833
2	1	13	8.4537	8.16125	33.9465	69.8092
2	1	14	9.62076	11.0978	46.6855	80.0764
2	1	15	10.1284	9.03289	49.6684	79.9875
2	1	16	13.2956	5.34541	35.6552	75.4377
2	1	17	12.7397	2.67877	49.0942	79.158
2	1	18	11.8655	6.70036	40.9793	69.5942
2	1	19	11.6146	12.4104	43.3896	74.3491
2	1	20	12.8346	8.39106	44.7617	71.7474
2	1	21	11.8948	8.5977	31.5009	63.9277
2	1	22	11.0334	9.21724	41.2732	74.3644
2	1	23	12.8128	10.7168	49.2677	78.5914
2	1	24	11.5039	9.01448	39.9742	71.6635
2	1	25	12.4783	8.03563	41.0366	74.2442
2	1	26	12.8009	10.7459	45.8114	75.5772
2	2	1	13.3796	6.65924	39.62	78.0425
2	2	2	12.7719	5.18376	38.0488	59.091
2	2	3	12.206	4.92511	29.7511	71.6991
2	2	4	11.7369	13.9488	42.8168	70.4771
2	2	5	13.7515	6.74803	42.3149	77.4701
2	2	6	10.8633	7.51701	50.9355	84.1368
2	2	7	11.7408	13.8939	49.979	75.9891
2	2	8	10.9153	14.615	51.899	77.7597
2	2	9	12.8323	11.4445	47.3508	77.1511
2	2	10	11.5202	15.8239	51.5925	84.3225
2	2	11	10.6019	10.0736	47.8194	79.7293
2	2	12	10.4309	9.36305	55.1148	83.9874
2	2	13	9.41062	13.9192	51.2834	75.3157
2	2	14	8.35852	22.6624	59.7473	75.8429
2	2	15	8.61579	15.4046	62.9102	79.027
2	2	16	8.83112	11.664	54.6471	72.5653
2	2	17	9.90679	8.43268	42.8495	67.6338
2	2	18	7.89368	6.84511	42.9912	67.3323
2	2	19	9.31146	6.5948	38.0189	63.0361
2	2	20	10.6934	4.96867	34.2464	61.885
2	2	21	11.503	3.42734	41.5959	66.7295
2	2	22	8.78306	7.20528	36.3162	68.6882
2	2	23	10.3931	3.77308	40.2272	70.8416
2	2	24	12.2895	3.41147	32.5963	60.6906
2	2	25	11.5333	2.27699	27.291	59.771
2	2	26	10.5851	7.73847	31.0779	57.1154

## Sheet: codebook
Variable Name	Variable Label	Code Label	Notes
region	Region	1 "Piedmont" 2 "Emilia-Romagna"
period	Study period	1 "2018/19" 2 "2019/20"
week	Week of the year	1 "Dec 11-17" … 26 "June 03-09"	The last day of the 2018/19 period is June 10
hosp_std_rate	Hip-fracture hospitalization rate (× 100,000 pop.)		Standardized by sex and age
surg0_std_rate	Hip-fracture surgery initiated on the same day as hospital admission (%)		Standardized by sex, age and enhanced Charlson index
surg1_std_rate	Hip-fracture surgery initiated within 1 day of hospital admission (%)		Standardized by sex, age and enhanced Charlson index
surg2_std_rate	Hip-fracture surgery initiated within 2 days of hospital admission (%)		Standardized by sex, age and enhanced Charlson index
